# Supplementary material for: Effect of an ionic environment on membrane fouling: a molecular dynamics study
Source: Royal Society of Chemistry journal article supplement (doi:10.1039/d0cp05268j), 2021-01-01
Supplement: d0cp05268j1.pdf [file d0cp05268j1.pdf]

# Effect of Ionic environment on Membrane Fouling: A Molecular Dynamics Study

Shivam Tiwari,<sup>†</sup> Abhijit Gogoi,<sup>‡</sup> and K. Anki Reddy<sup>\*,†</sup>

<sup>†</sup>*Department of Chemical Engineering, Indian Institute of Technology Guwahati, Assam,  
India.*

<sup>‡</sup>*Department of Mechanical Engineering, Indian Institute of Technology Guwahati, Assam,  
India.*

E-mail: anki.reddy@iitg.ac.in

## GO nanosheet

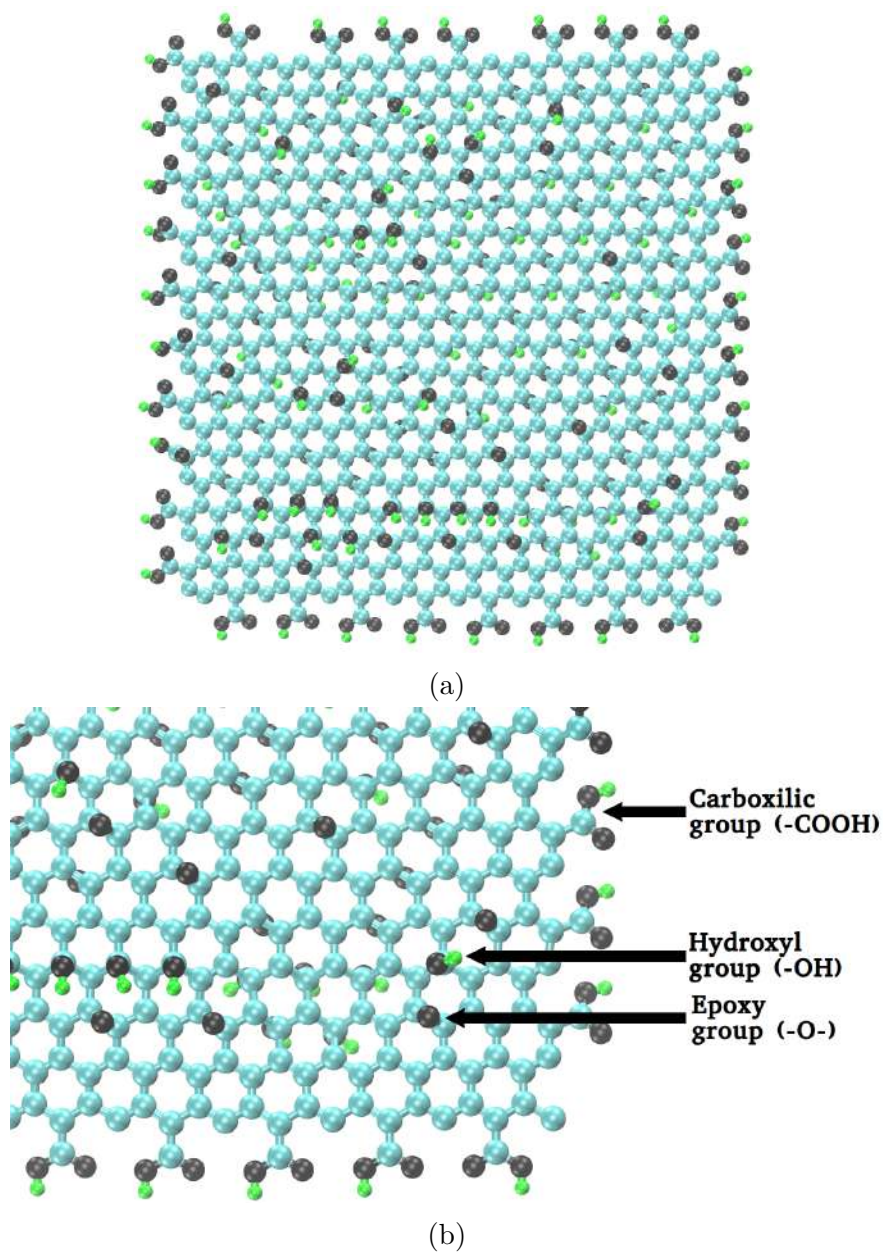

Figure S1: (a) GO nanosheet. (b) The distribution of functional groups on GO nanosheet. The green color is for hydrogen atoms, the black color is for oxygen atoms and the cyan color is for carbon atoms.

## Partial charges and other parameters for GO

Table S1: Nonbonded potential parameters and charges for atoms of GO.

| atom    | $\sigma$ (Å) | $\epsilon$ (kcal/mol) | charge (q) |
|---------|--------------|-----------------------|------------|
| C(C—C)  | 1.908        | 0.053                 | 0          |
| C(C—OH) | 1.908        | 0.053                 | +0.2       |
| C(C=O)  | 2.105        | 0.105                 | +0.52      |
| O(C—O)  | 1.627        | 0.139                 | -0.4       |
| O(O—H)  | 1.751        | 0.170                 | -0.683     |
| O(O=C)  | 0.210        | 1.661                 | -0.44      |
| O(C—OH) | 1.684        | 0.170                 | -0.53      |
| H(C—OH) | 0.0          | 0.0                   | +0.45      |
| H(O—H)  | 0.0          | 0.0                   | +0.418     |

# Polyamide

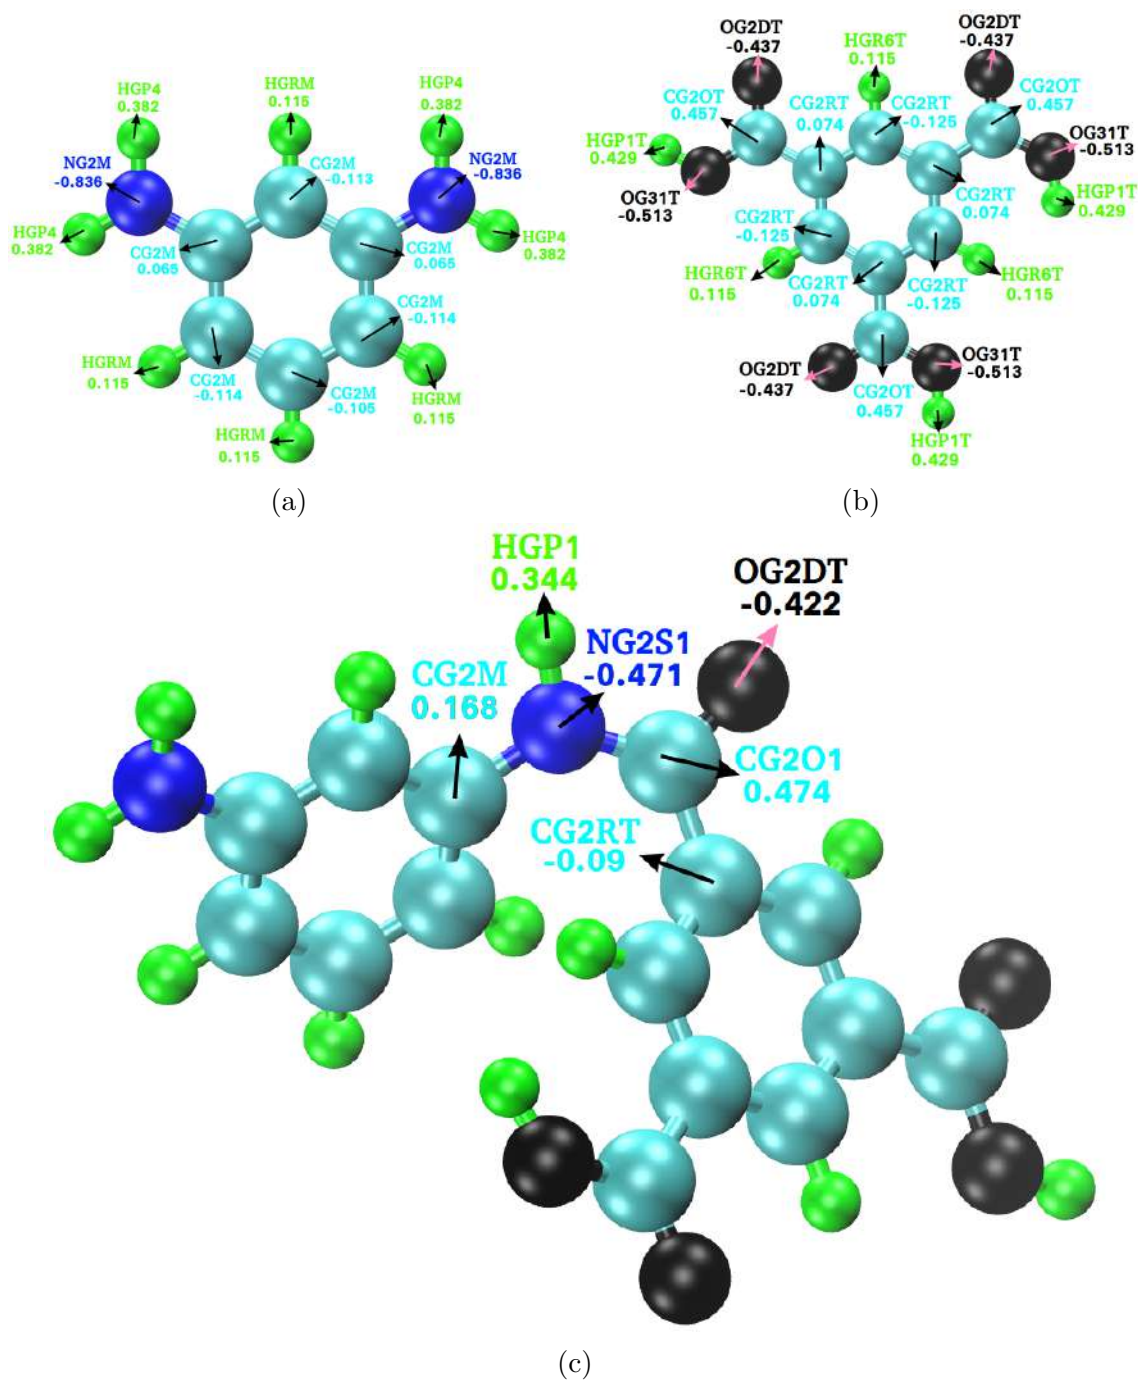

Figure S2: Monomers and atomtypes of (a) MPD (b) TMO and (c) amide linkage between an MPD and TMO monomer.

## Functional Groups on Graphene Oxide

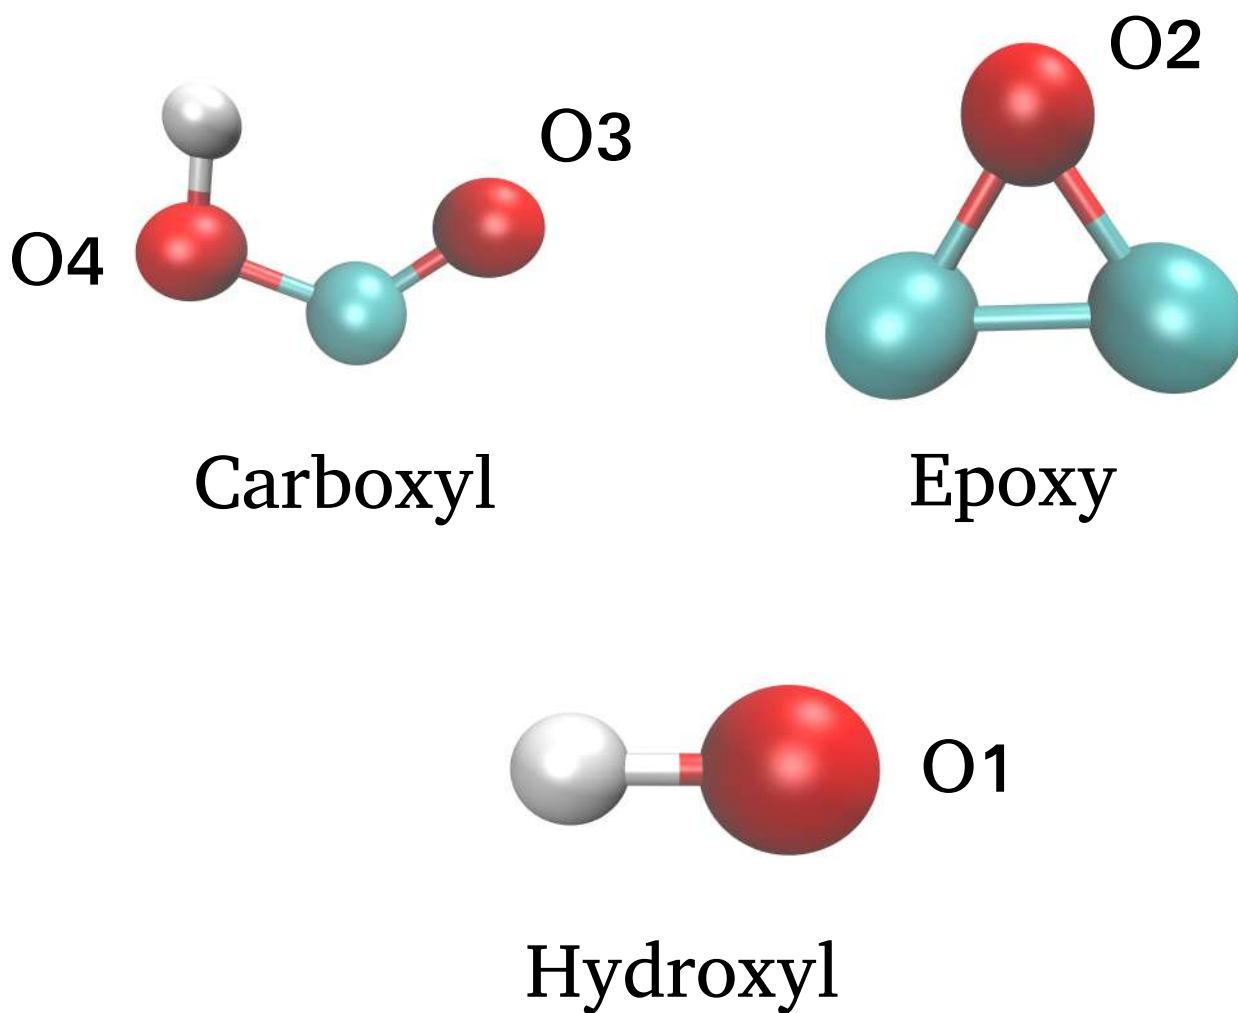

Figure S3: Different functional groups present on the graphene oxide surface and the atom types of oxygen atom on them.

## Surface Charge Distribution

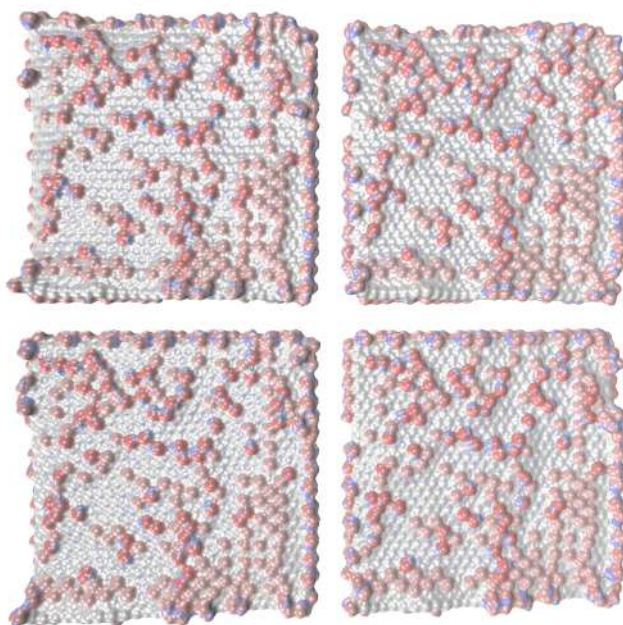

(a)

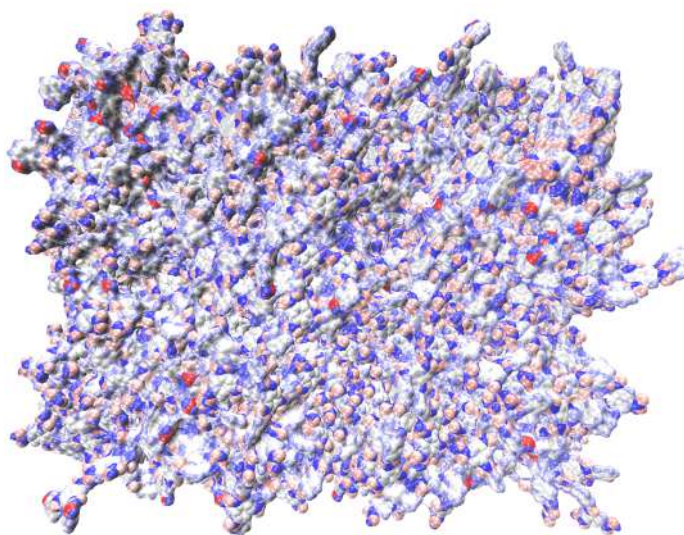

(b)

Figure S4: Charge distribution on the surfaces of the two membranes (a) Graphene Oxide (b) Polyamide. The blue, red and white color represents positive, negative and neutral charges.



## Structural Evolution of Protein

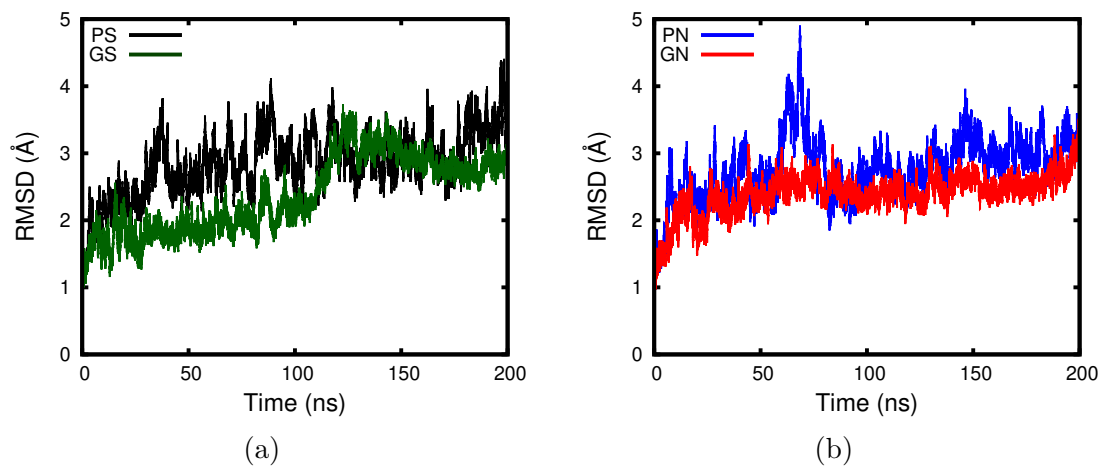

Figure S5: Time evolution of RMSD of backbone alpha carbon atoms of protein for (a) excess ions systems and (b) without excess ion systems .

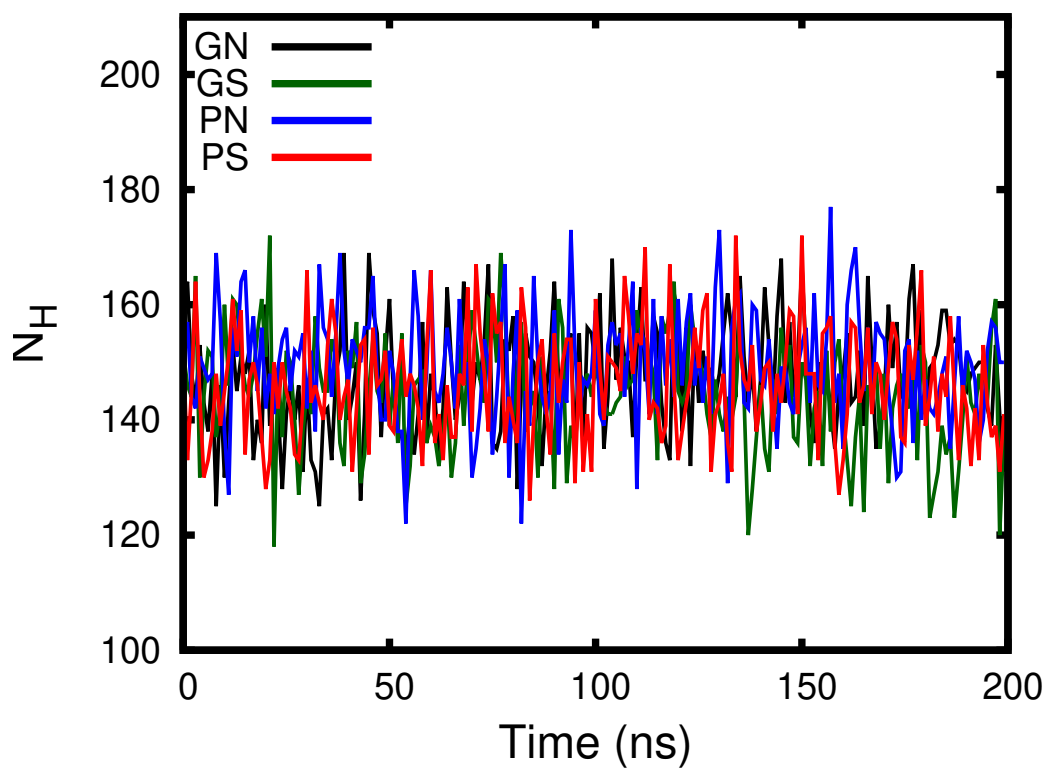

Figure S6: Time evolution of the number of hydrogen bonds in protein for all the systems .
